# Supplementary material for: Radiation resistant chalcopyrite CIGS solar cells: proton damage shielding with Cs treatment and defect healing via heat-light soaking
Source: Royal Society of Chemistry journal article supplement (doi:10.1039/d3ta06998b), 2024-01-01
Supplement: d3ta06998b1.pdf [file d3ta06998b1.pdf]

## Supporting Information

### **Radiation Resistant Chalcopyrite CIGS Solar Cells: Proton Damage Shielding with Cs Treatment and Defect Healing via Heat-Light Soaking**

*Tzu-Ying Lin<sup>\*1</sup>, Chi-Feng Hsieh<sup>1</sup>, Ayaka Kanai<sup>2</sup>, Takahiko Yashiro<sup>3</sup>, Wen-Jing Zeng<sup>4</sup>, Jian-Jie Ma<sup>4</sup>, Sung-Fu Hung<sup>4</sup>, Mutsumi Sugiyama<sup>3</sup>*

\* Corresponding author

Tzu-Ying Lin

Tzu-Ying Lin, Chi-Feng Hsieh

1. Department of Materials Science and Engineering, National Tsing Hua University, 101, Sec. 2, Kuang-Fu Road, Hsinchu 300044, Taiwan R. O. C.  
E-mail: tzuying.lin@mx.nthu.edu.tw

Ayaka Kanai,

2. Department of Electrical, Electronics and Information Engineering, Nagaoka University of Technology, 1603-1 Kamitomioka, Nagaoka, Niigata 940-2188, Japan

Takahiko Yashiro, Mutsumi Sugiyama

3. Research Institute of Science and Technology, Tokyo University of Science, 2641 Yamazaki, Noda, 278-8510, Japan

Wen-Jing Zeng, Jian-Jie Ma, Sung-Fu Hung

4. Department of Applied Chemistry, National Yang Ming Chiao Tung University, No. 1001, Daxue Rd. East Dist., Hsinchu 300093, Taiwan R. O. C.

Keywords: CIGS, proton, irradiation, Cs, shielding, defect healing, HLS

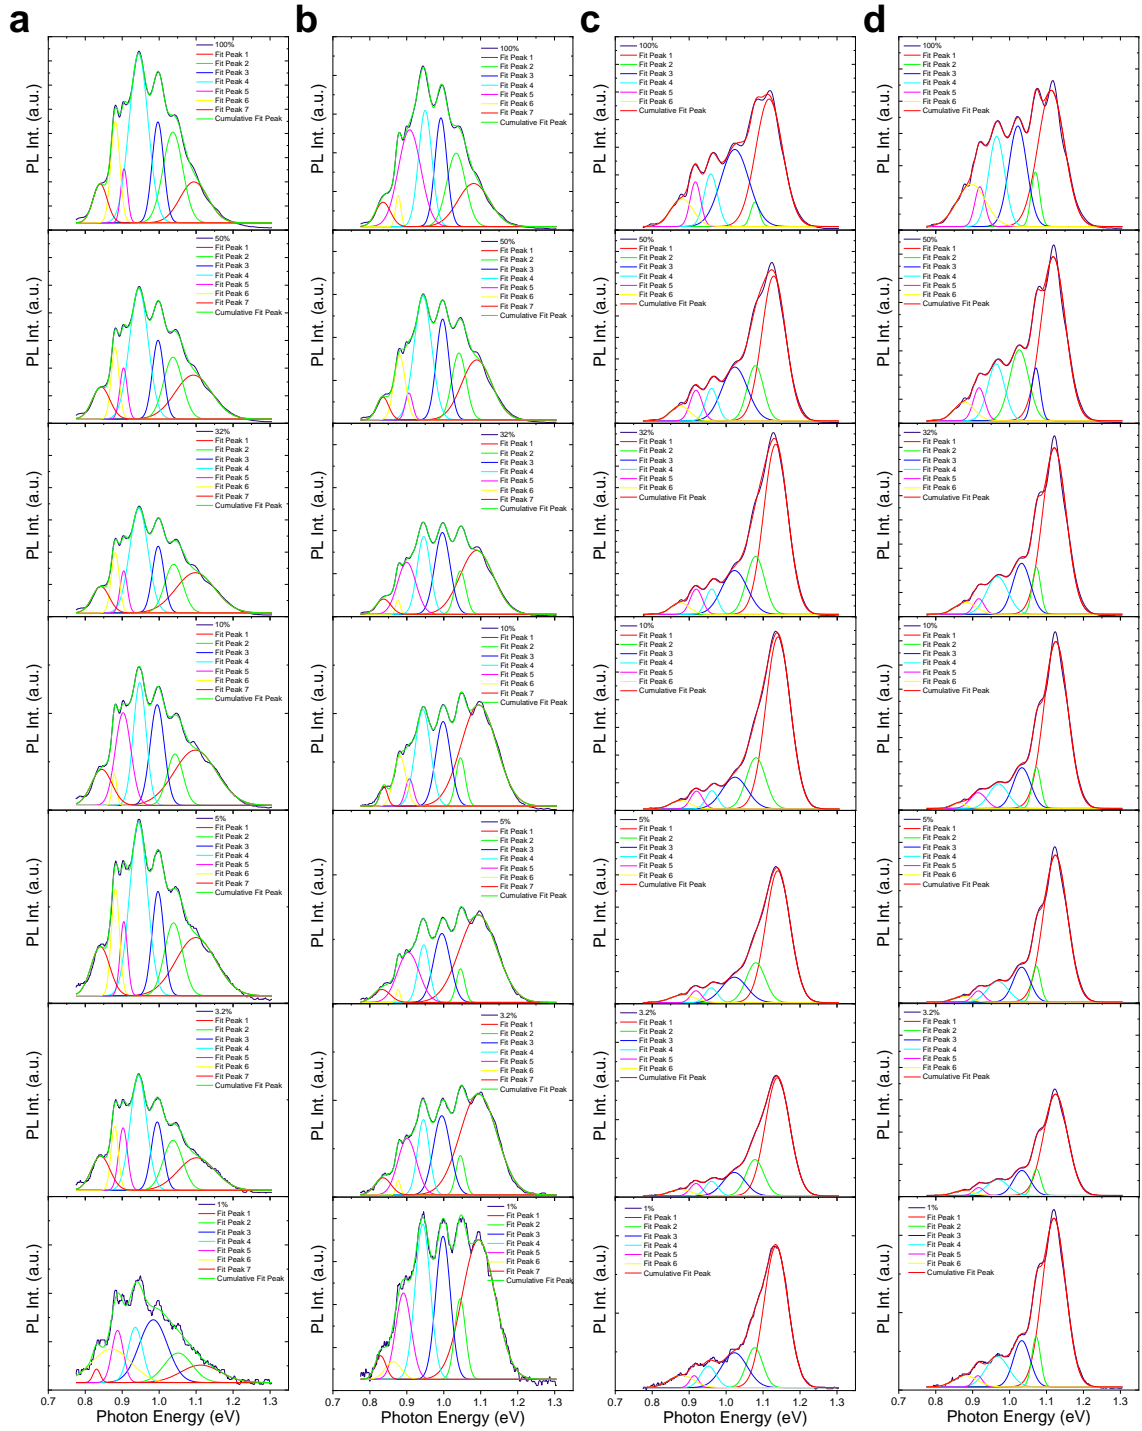

**Figure S1.** Details of deconvolution in power dependence PL of (a) irradiated control CIGS (p-C2), (b) irradiated control CIGS followed by HLS (HLS-p-C2), (c) irradiated Cs-treated CIGS (p-Cs2), and (b) irradiated Cs-treated CIGS followed by HLS (HLS-p-Cs2).

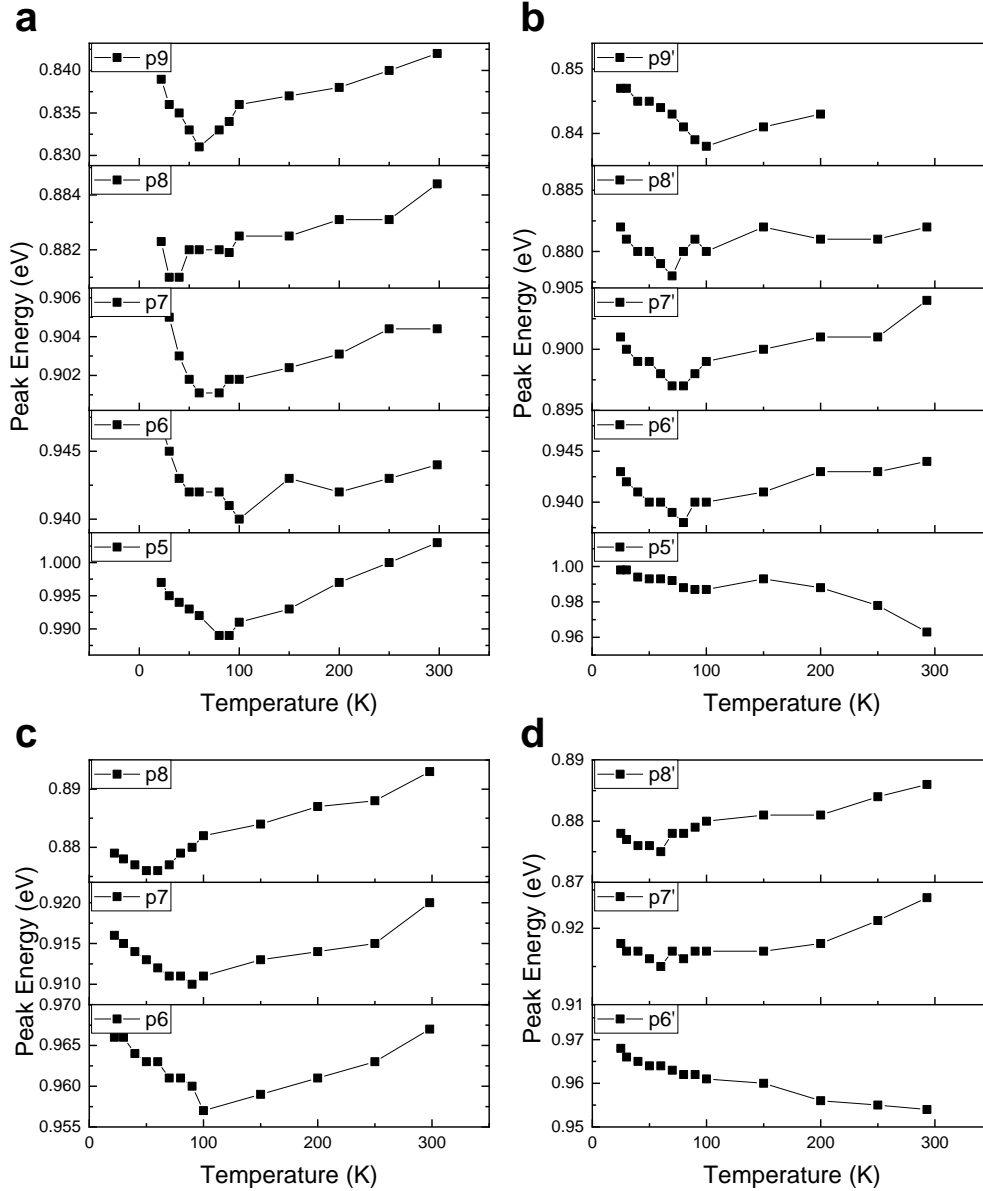

**Figure S2.** PL-peaks shift with temperature for (a) irradiated control CIGS (p-C2), (b) p-C2 followed by HLS (HLS-p-C2), (c) irradiated Cs-treated CIGS (p-Cs2), and (d) p-Cs2 followed by HLS (HLS-p-Cs2). The characteristic transition of DAPs with potential fluctuation is observed as the peak energy initially undergoes a redshift and then transitions to a blueshift when temperature increases from low temperature to room temperature. Some DAPs were annihilated by HLS, such as p5' in HLS-p-C2 and p6' in HLS-p-Cs2.

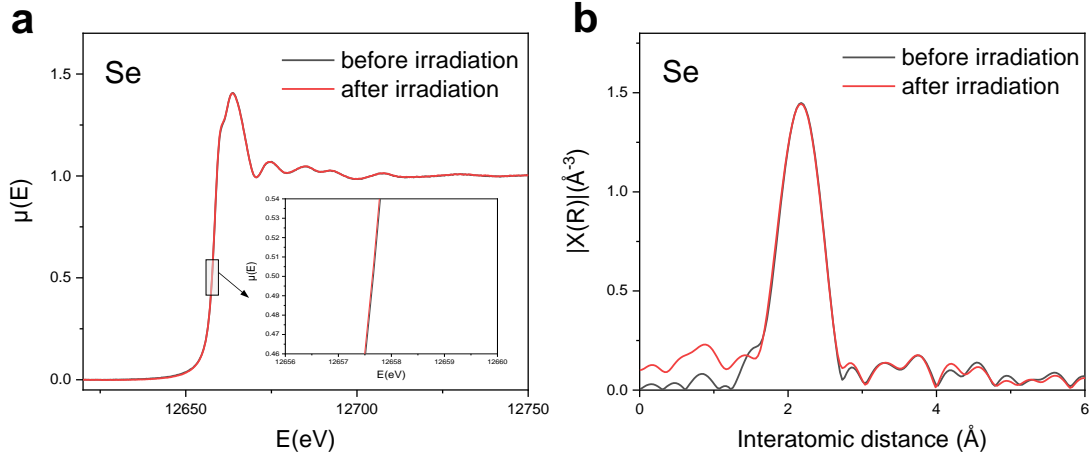

**Figure S3.** (a) XANES spectra for Se of CIGS sample before and after irradiation. The inserted figures show the enlarged K-edge spectra and the edges are overlapped without shifting. (b) Corresponding EXAFS spectra for Se before and after irradiation.

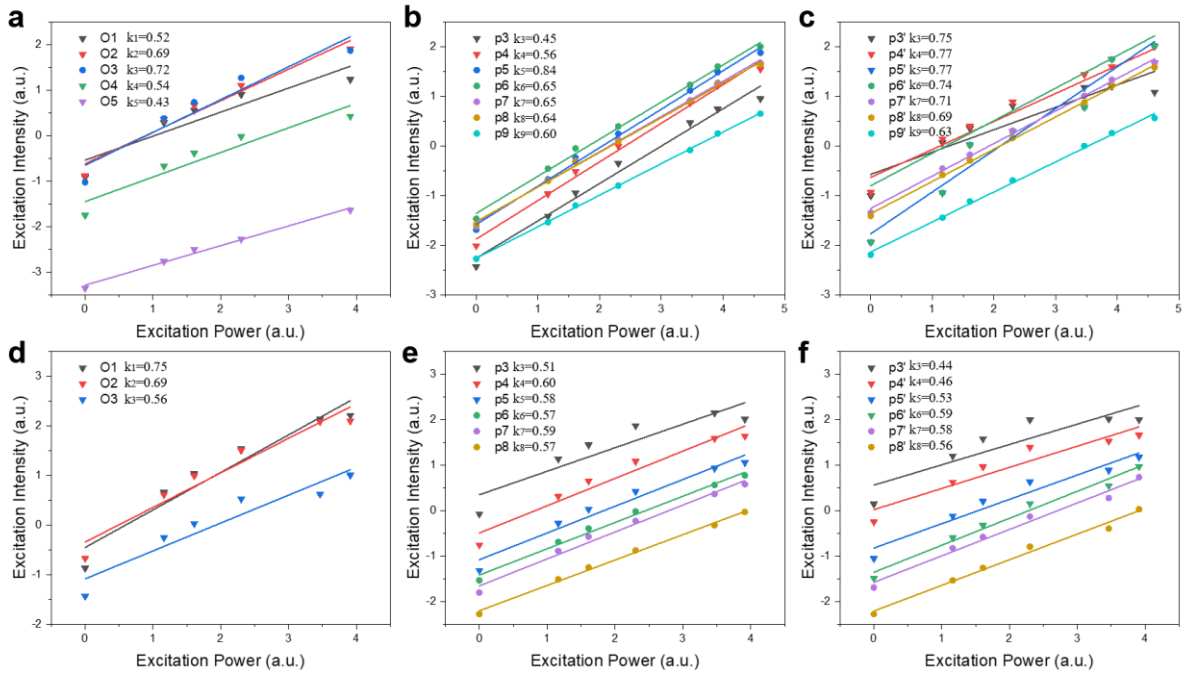

**Figure S4.**  $k$  factors fitted from equation  $I_{PL}(\phi) \propto \phi^k$  of samples (a) C2, (b) p-C2, (c) HLS-p-C2, (d) Cs2, (e) p-Cs2, and (f) HLS-p-Cs2, where  $I_{PL}$  is the PL intensity,  $\phi$  is the excitation intensity and  $k$  is a characteristic parameter. All the calculated  $k$  factors are  $< 1$ , indicating these analyzed peaks belong to donor-acceptor or free-bound transitions.

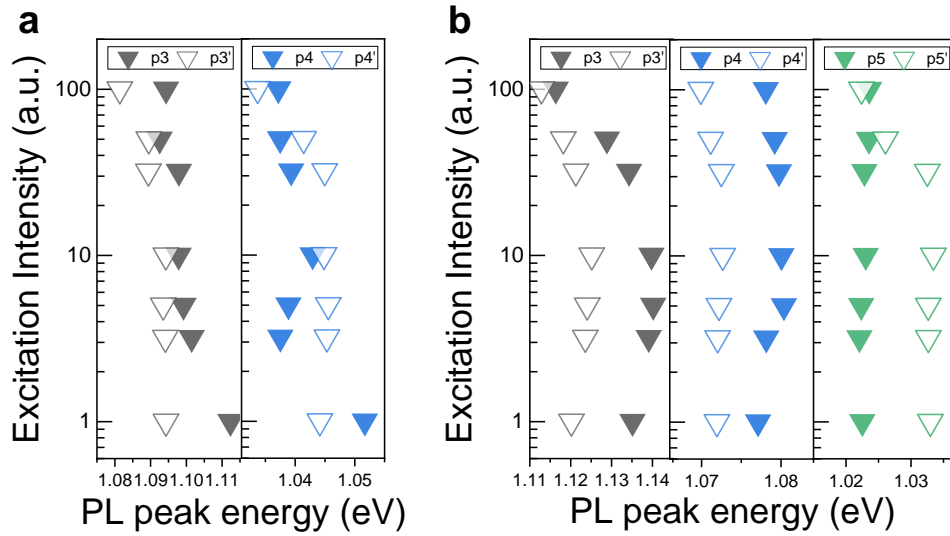

**Figure S5.** (a) Plot depicting peak energies of p3 to p4 (p-C2) and p3' to p4' (HLS-p-C2) in control CIGS. (b) Plot depicting peak energies of p3 to p5 (p-Cs2) and p3' to p5' (HLS-p-Cs2) in Cs-treated CIGS. Scatters of the inverted triangle ( $\blacktriangledown, \triangledown$ ) represent the FB transition.

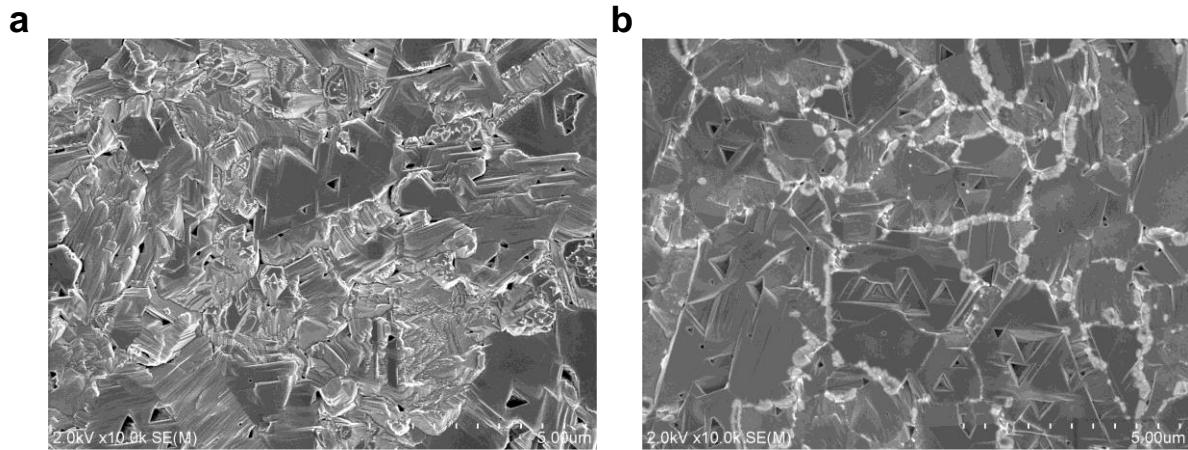

**Figure S6.** SEM image of (a) control, and (b) Cs-treated CIGS before irradiation.

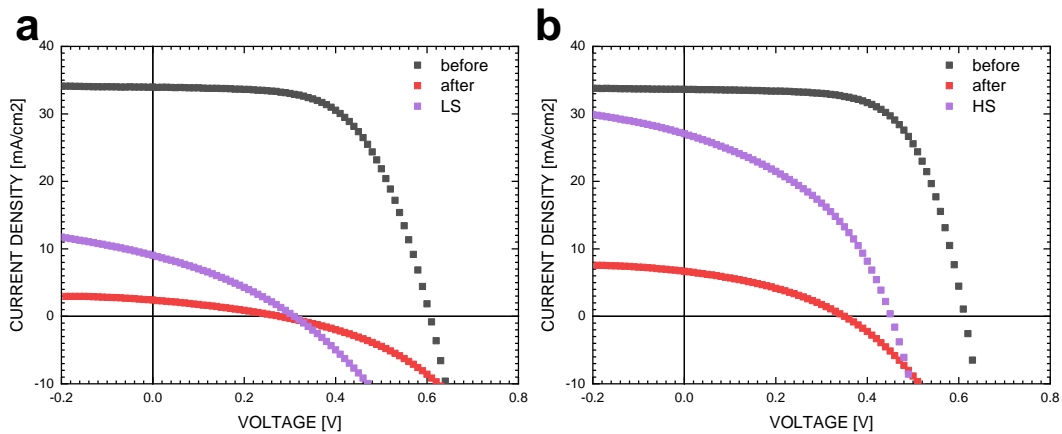

**Figure S7.**  $J$ - $V$  curves of (a) control 3 before, after irradiation, and followed by light soaking (LS); (b) control 4 before, after irradiation, and followed by heat soaking (HS).
